# Supplementary material for: PGE2 mediates EGFR internalization and nuclear translocation via caveolin endocytosis promoting its transcriptional activity and proliferation in human NSCLC cells
Source: PubMed Central journal article supplement (PMC5871088; doi:10.18632/oncotarget.24499), 2018-02-15
Supplement: oncotarget-09-14939-s001.pdf [file oncotarget-09-14939-s001.pdf]

## PGE<sub>2</sub> mediates EGFR internalization and nuclear translocation *via* caveolin endocytosis promoting its transcriptional activity and proliferation in human NSCLC cells

### SUPPLEMENTARY MATERIALS

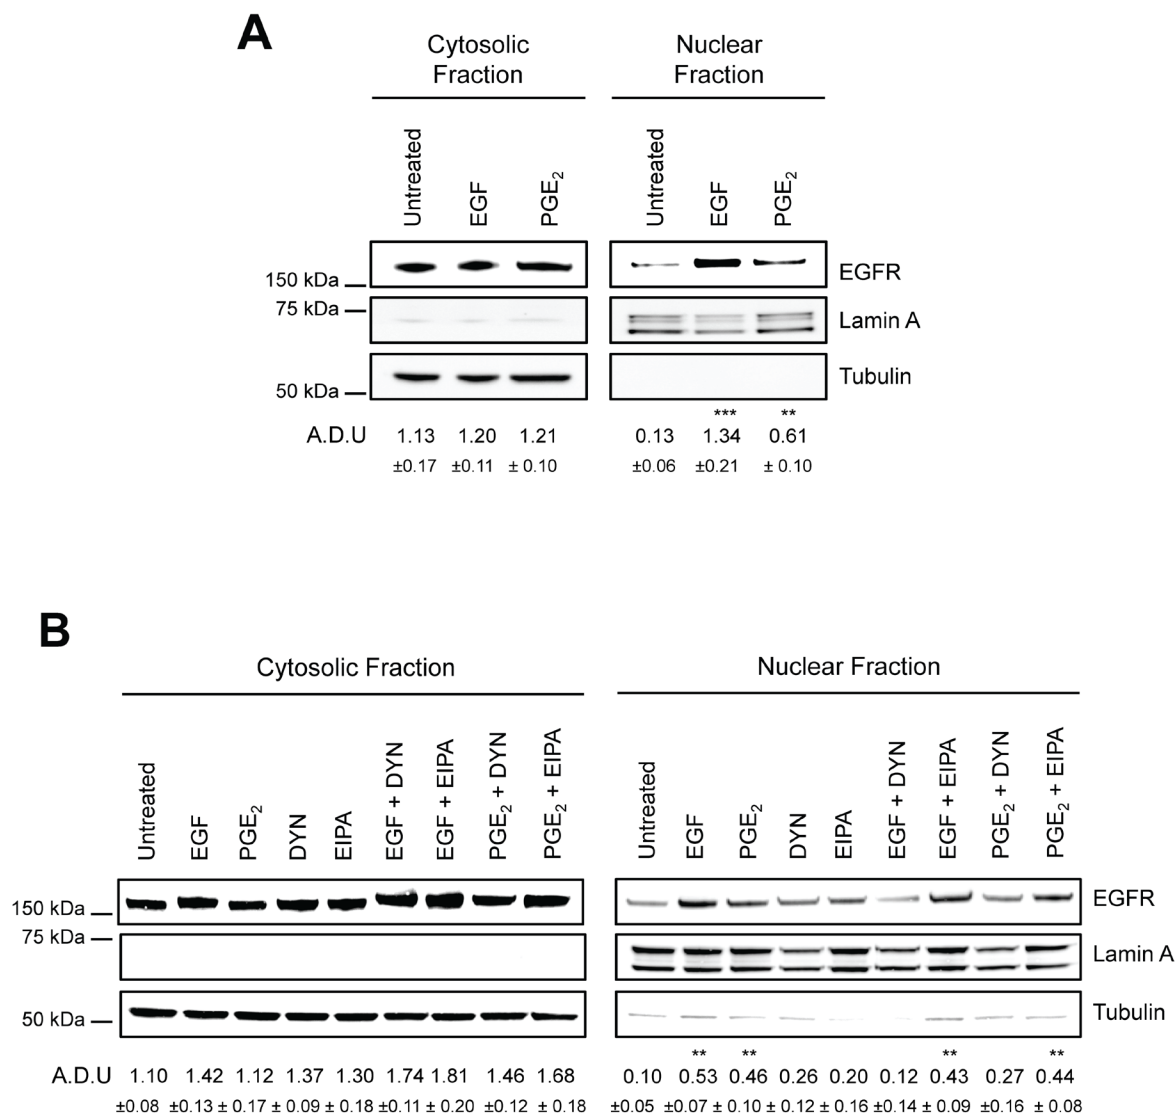

### Supplementary Figure 1: Dynamin inhibition blocks EGF- and PGE<sub>2</sub>-induced EGFR nuclear translocation in GLC82.

(A) Immunoblotting analysis of EGFR expression in cytosolic and nuclear fraction in overnight starved GLC82 exposed to 10 min to 25ng/ml EGF or 1 $\mu$ M PGE<sub>2</sub>. (B) GLC82 cells were starved overnight and then treated with dynasore 80 $\mu$ M (DYN) or 100 $\mu$ M 5-(N-Ethyl-N-isopropyl) amiloride (EIPA) for 30 min before challenge with 25 ng/ml EGF or 1 $\mu$ M PGE<sub>2</sub> for 10 and 60 min respectively. EGFR level in cytoplasmic and nuclear fraction was assessed using immunoblot with indicated antibodies. Tubulin and Lamin A were used as loading control for cytosolic and nuclear fraction. Immunoblotting quantification was expressed in A.D.U. (arbitrary density unit) and as mean  $\pm$  SD. \*p < 0.05, \*\*p < 0.01, \*\*\*p < 0.001 vs Ctrl. EGFR in the cytoplasmic and nuclear fractions was normalized to Tubulin or Lamin A respectively. The experiments were performed three times.

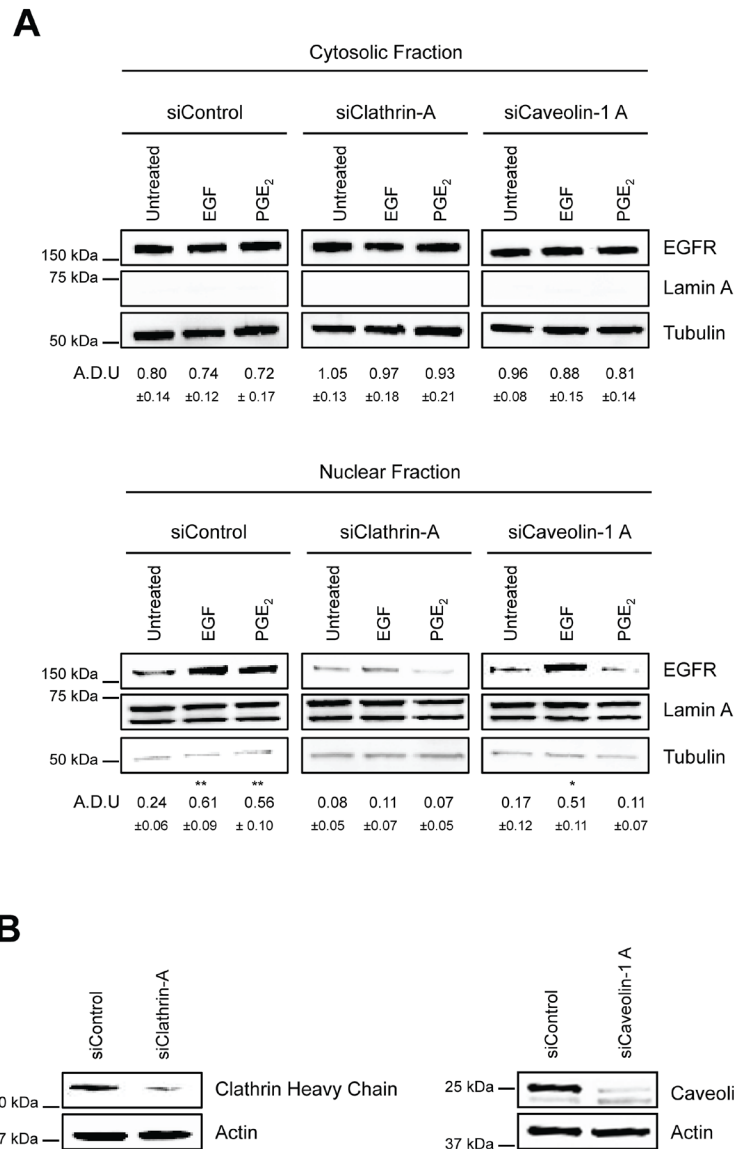

**Supplementary Figure 2: PGE<sub>2</sub> promotes EGFR internalization via Clathrin- and Caveolin-mediated endocytosis in GLC82.** (A) GLC82 cells were transfected with siRNA control or siRNAs against Clathrin Heavy Chain or Caveolin-1 for 24 h. After that, cells were serum starved overnight and then exposed to 25ng/ml EGF for 10 min or to 1μM PGE<sub>2</sub> for 60 min. EGFR level in cytoplasmic and nuclear fraction was assessed using immunoblot with indicated antibodies. Tubulin and Lamin A were used as loading control for cytosolic and nuclear fraction. Immunoblotting quantification was expressed in A.D.U. (arbitrary density unit) and as mean ± SD. \*p < 0.05, \*\*p < 0.01 vs Ctrl. EGFR in the cytoplasmic and nuclear fractions was normalized to Tubulin or Lamin A respectively. (B) Knockdown efficiency was verified by immunoblotting with Clathrin Heavy Chain or Caveolin-1 antibodies, actin was used as loading control. The experiments were performed three times.

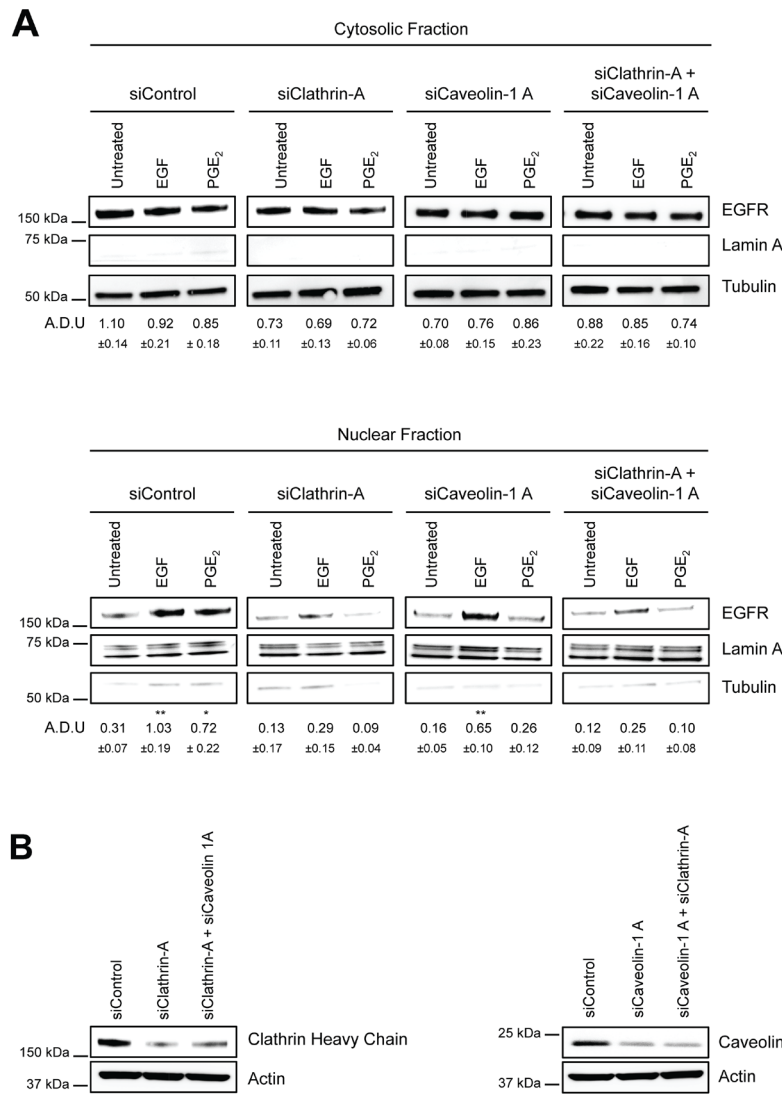

**Supplementary Figure 3: Concurrent knockdown of Clathrin Heavy Chain and Caveolin-1 did not enhance the inhibition of PGE<sub>2</sub>-induced EGFR nuclear translocation compared to individual siRNAs.** (A) A549 cells were transfected with siRNA control or siRNAs against Clathrin Heavy Chain or Caveolin-1 or the combination for 24 h. After that, cells were serum starved overnight and then exposed to 25ng/ml EGF for 10 min or to 1μM PGE<sub>2</sub> for 60 min. EGFR level in cytoplasmic and nuclear fraction was assessed using immunoblot with indicated antibodies. Tubulin and Lamin A were used as loading control for cytosolic and nuclear fraction. Data are shown only for siClathrin-A and siCaveolin-1A, similar data were obtained with siClathrin-B, siCaveolin-1B and siClathrin-B+siCaveolin-1B. Immunoblotting quantification was expressed in A.D.U. (arbitrary density unit) and as mean ± SD. \*p < 0.05, \*\*p < 0.01 vs Ctrl. EGFR in the cytoplasmic and nuclear fractions was normalized to Tubulin or Lamin A respectively. (B) Knockdown efficiency was verified by immunoblotting with Clathrin Heavy Chain or Caveolin-1 antibodies, actin was used as loading control. The experiments were performed three times.

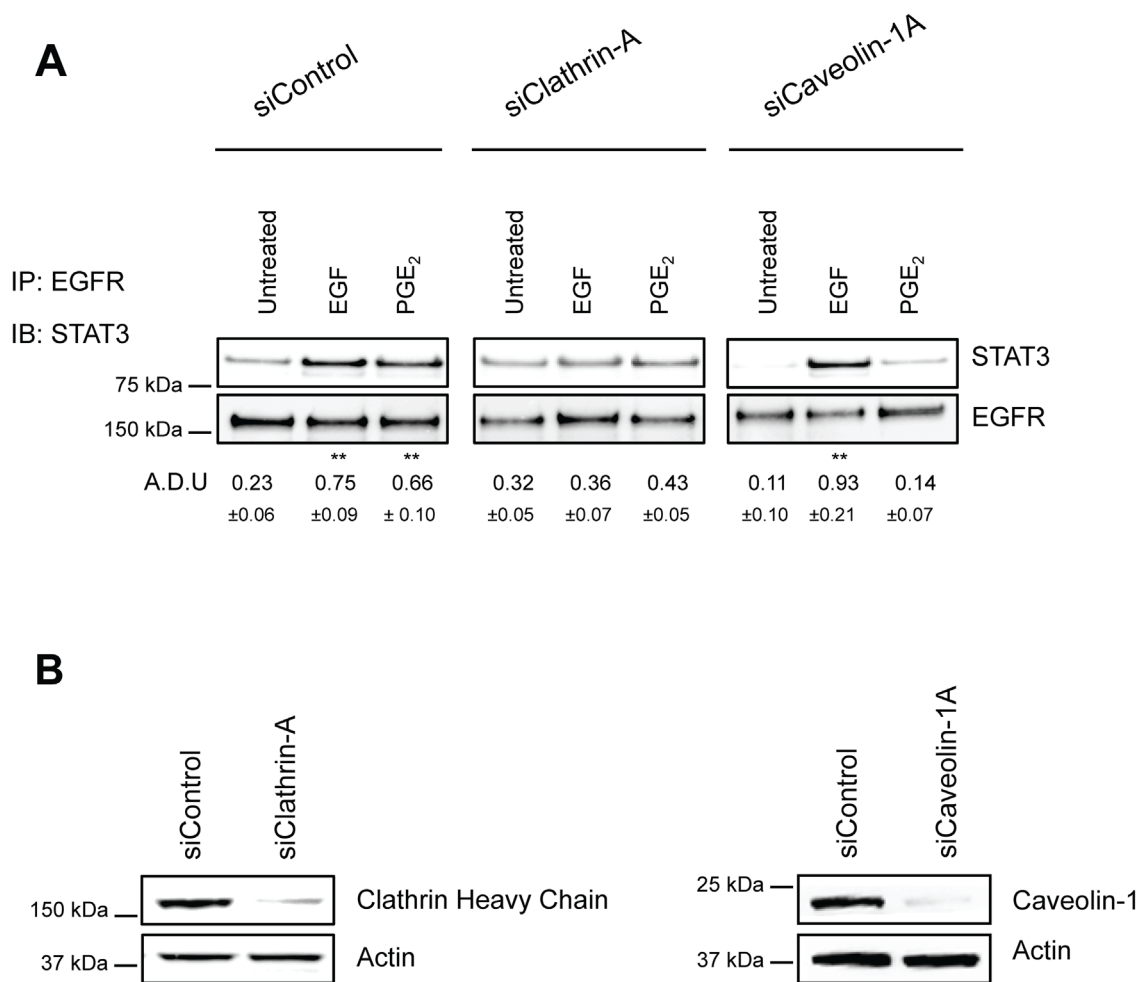

**Supplementary Figure 4: PGE<sub>2</sub> induces the formation of EGFR-STAT3 complex into the nucleus in GLC82.** (A) GLC82 cells were transfected with siRNA Control or siRNA against Clathrin Heavy Chain or against Caveolin-1 for 24 h. After that, cells were serum starved overnight and treated with 25ng/ml EGF for 10 min or 1μM PGE<sub>2</sub> for 60 min. Whole cell lysates were subjected to immunoprecipitation with anti-EGFR antibody and analyzed by immunoblotting with anti-STAT3 antibody. Immunoblotting quantification was expressed in A.D.U. (arbitrary density unit) and as mean ± SD. \*\*p < 0.01 vs Ctrl. STAT3 was normalized to EGFR. (B) Knockdown efficiency was verified via western blot with Clathrin heavy chain and Caveolin-1 antibodies, actin was used as loading control. The experiments were performed three times.

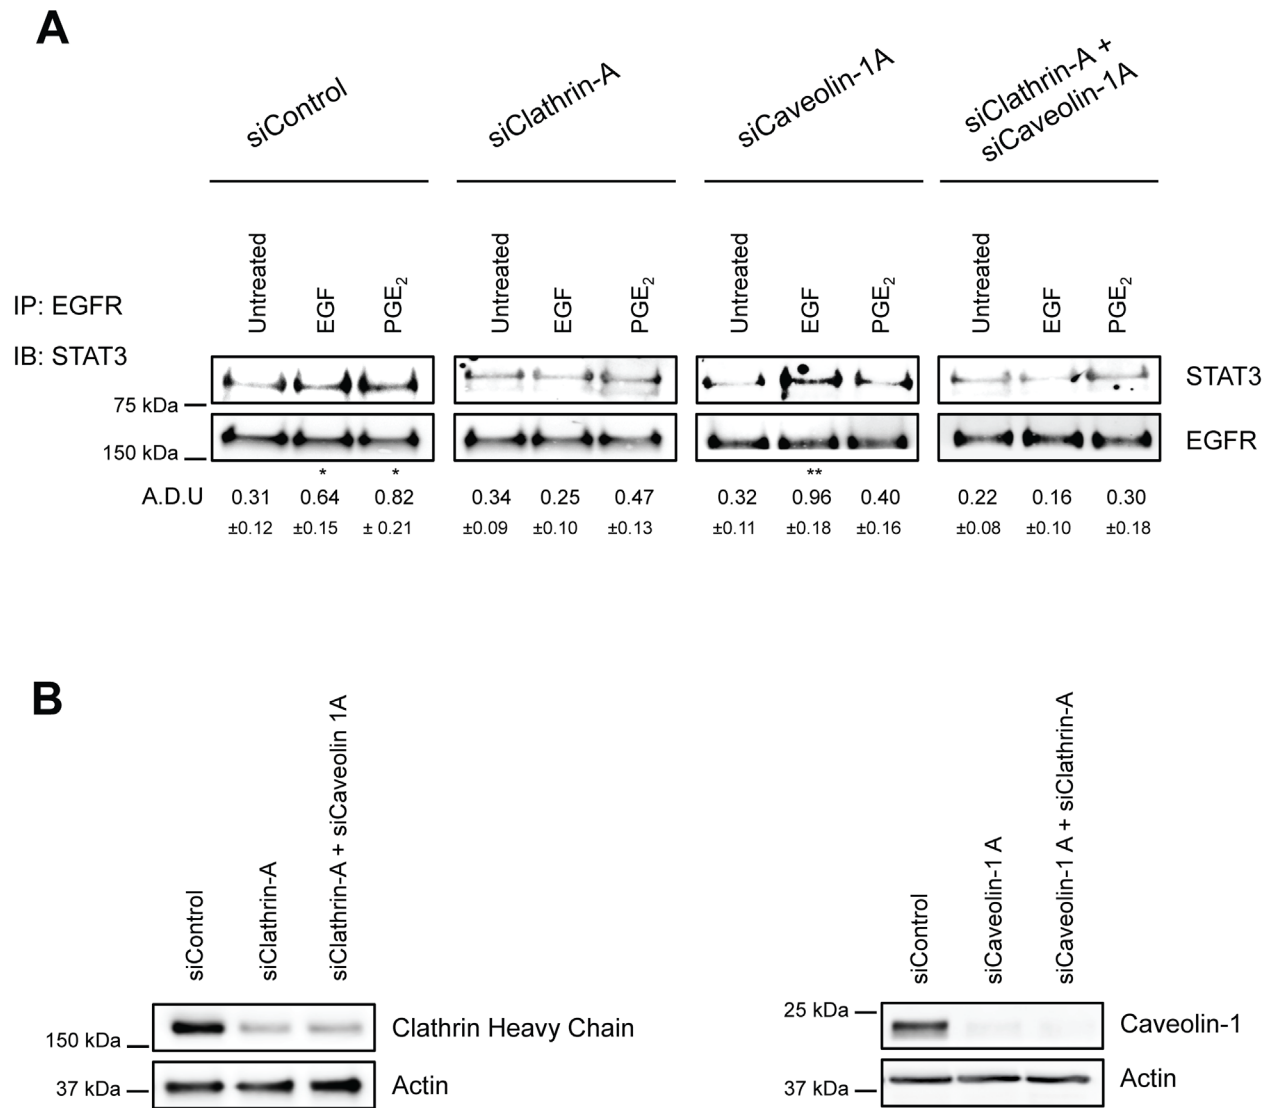

**Supplementary Figure 5: Concurrent knockdown of Clathrin Heavy Chain and Caveolin-1 did not enhance the inhibition of PGE<sub>2</sub>-induced EGFR-STAT3 co-immunoprecipitation compared to individual siRNAs.** (A) A549 cells were transfected with siRNA Control or siRNA against Clathrin Heavy Chain or against Caveolin-1 or the combination for 24 h. Cells were then serum starved overnight and treated with 25ng/ml EGF for 10 min or 1μM PGE<sub>2</sub> for 60 min. Whole cell lysates were subjected to immunoprecipitation with anti-EGFR antibody and analyzed by immunoblotting with anti-STAT3 antibody. (B) Knockdown efficiency was verified via western blot with Clathrin heavy chain and Caveolin-1 antibodies, actin was used as loading control. Data are shown only for siClathrin-A and siCaveolin-1A, similar data were obtained with siClathrin-B, siCaveolin-1B and siClathrin-B+ siCaveolin-1B. Immunoblotting quantification was expressed in A.D.U. (arbitrary density unit) and as mean ± SD. \*p < 0.05, \*\*p < 0.01 vs Ctrl. STAT3 was normalized to EGFR. The experiments were performed three times.

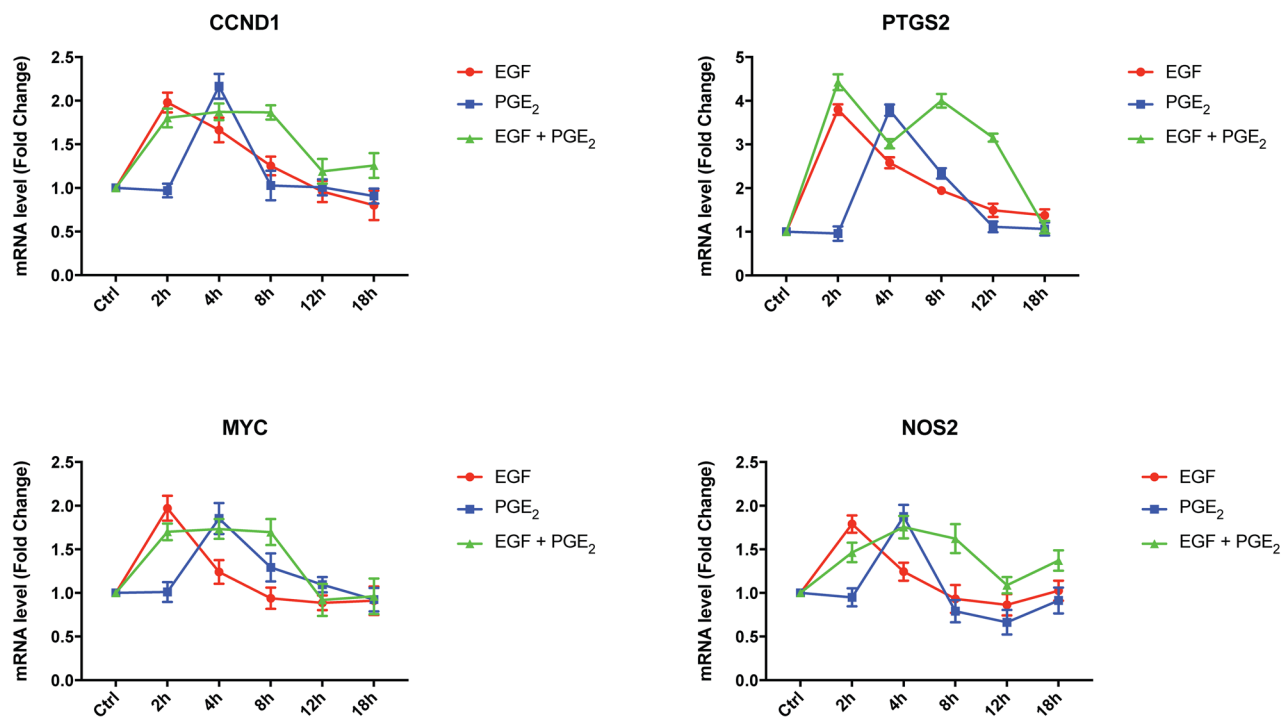

**Supplementary Figure 6: EGF and PGE<sub>2</sub> induces the transcription of nuclear EGFR target genes in GLC82 up to 8 hours.** GLC82 cells were starved overnight and then treated with 25ng/ml EGF or 1 $\mu$ M PGE<sub>2</sub> or the combination for 2, 4, 8, 12, 18 h. RNA was isolated and analyzed by qRT-PCR for a panel of nuclear EGFR target genes. The data are presented as mean of fold change  $\pm$  SD of three independent experiments, relative to non-treated cells (Control), which were assigned to 1. Statistical analysis is reported in Supplementary Table 1.

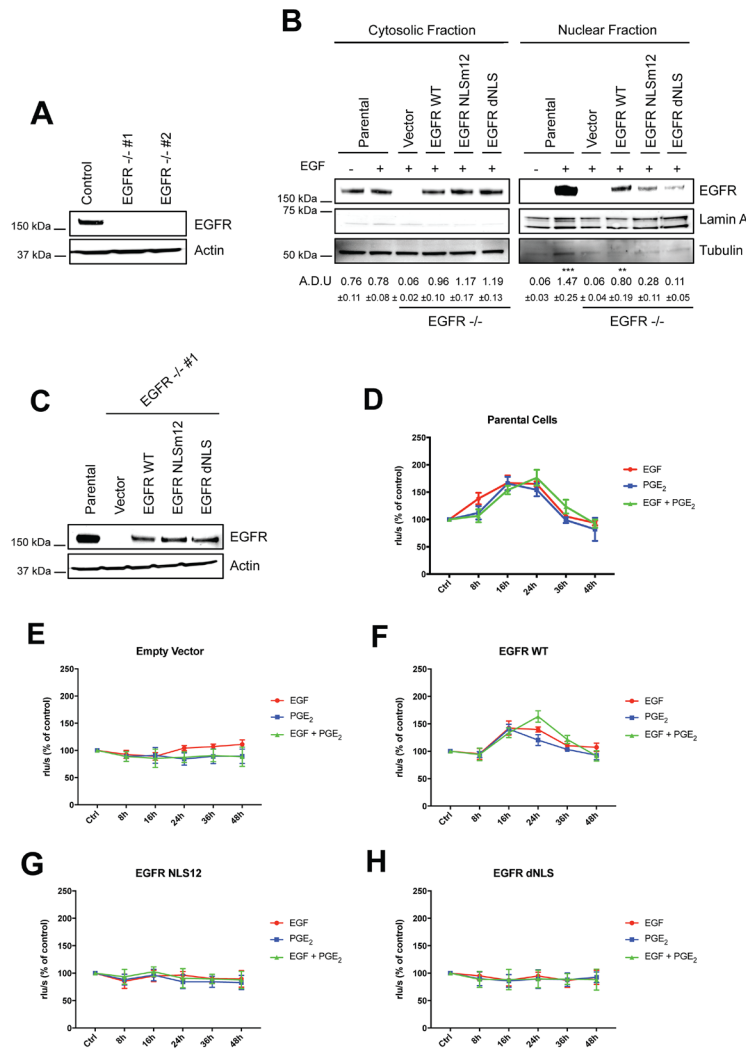

**Supplementary Figure 7: EGF and PGE<sub>2</sub> induce nuclear EGFR-mediated GLC82 cell proliferation.** (A) Immunoblotting analysis of EGFR expression in GLC82 wild type cells and two clones knockout for EGFR, Actin was used as loading control. (B) EGFR knockout GLC82 cells were transiently transfected with Vector or EGFR-WT or EGFR NLS mutant (NLSm12 or dNLS) plasmids for 48 h. Then EGFR nuclear import in response to 25ng/ml EGF for 10 min was analyzed by immunoblotting upon cell fractionation. Parental cells were included as a control. Tubulin and Lamin A were used as loading control for cytosolic and nuclear fraction respectively. Immunoblotting quantification was expressed in A.D.U. (arbitrary density unit) and as mean  $\pm$  SD. \*\* $p < 0.01$ , \*\*\* $p < 0.001$  vs Ctrl. EGFR in the cytoplasmic and nuclear fractions was normalized to Tubulin or Lamin A respectively. (C) Expression of EGFR in EGFR knockout cells transfected with Vector, EGFR-WT and NLS mutant plasmids for 96 h. (D-H) Parental GLC82 cells or EGFR -/- #1, #2 cells transfected with Vector or EGFR WT or EGFR NLS12 or EGFR dNLS mutant plasmids for 24 h were harvested and seeded for BrdU incorporation assay. Cell proliferation was assessed by measuring the luminescence after 8, 16, 24, 36, 48 h treatment with EGF or PGE<sub>2</sub> or the combination. Data are mean  $\pm$  SD of triplicate cultures, expressed as % of control. Statistical analysis is reported in Supplementary Table 2.

**Supplementary Table 1: Statistical analysis of nuclear EGFR target genes regulated by EGF and PGE<sub>2</sub> in GLC82 cells**

| <b><i>CCND1</i></b>                      |                    |                    |                    |                    |             |
|------------------------------------------|--------------------|--------------------|--------------------|--------------------|-------------|
|                                          | <b>2h</b>          | <b>4h</b>          | <b>8h</b>          | <b>12h</b>         | <b>18h</b>  |
| EGF vs Ctrl                              | <b>0.0132 (*)</b>  | <b>0.0424 (*)</b>  | 0.1422 (ns)        | 0.767 (ns)         | 0.3618 (ns) |
| PGE <sub>2</sub> vs Ctrl                 | 0.7414 (ns)        | <b>0.0144 (*)</b>  | 0.8837 (ns)        | 0.9466 (ns)        | 0.3896 (ns) |
| EGF+PGE <sub>2</sub> vs Ctrl             | <b>0.0173 (*)</b>  | <b>0.0116 (*)</b>  | <b>0.0086 (**)</b> | 0.3103 (ns)        | 0.2998 (ns) |
| EGF+PGE <sub>2</sub> vs EGF              | 0.3746 (ns)        | 0.346 (ns)         | <b>0.0447 (*)</b>  | 0.339 (ns)         | 0.121 (ns)  |
| EGF+PGE <sub>2</sub> vs PGE <sub>2</sub> | <b>0.0244 (*)</b>  | 0.2273 (ns)        | <b>0.0469 (*)</b>  | 0.3902 (ns)        | 0,0664 (ns) |
| <b><i>PTGS2</i></b>                      |                    |                    |                    |                    |             |
|                                          | <b>2h</b>          | <b>4h</b>          | <b>8h</b>          | <b>12h</b>         | <b>18h</b>  |
| EGF vs Ctrl                              | <b>0.0019 (**)</b> | <b>0.0063 (**)</b> | <b>0.0097 (**)</b> | 0.0852 (ns)        | 0.1077 (ns) |
| PGE <sub>2</sub> vs Ctrl                 | 0.8266 (ns)        | <b>0.0021 (**)</b> | <b>0.0076 (**)</b> | 0.4551 (ns)        | 0.7069 (ns) |
| EGF+PGE <sub>2</sub> vs Ctrl             | <b>0.0028 (**)</b> | <b>0.0025 (**)</b> | <b>0.0032 (**)</b> | <b>0.0018 (**)</b> | 0.5326 (ns) |
| EGF+PGE <sub>2</sub> vs EGF              | 0.1017 (ns)        | 0.117 (ns)         | <b>0.0077 (*)</b>  | 0.0114 (ns)        | 0.2983 (ns) |
| EGF+PGE <sub>2</sub> vs PGE <sub>2</sub> | <b>0.0049 (**)</b> | <b>0.044 (*)</b>   | <b>0.0135 (*)</b>  | <b>0.0057 (**)</b> | 0.8588 (ns) |
| <b><i>MYC</i></b>                        |                    |                    |                    |                    |             |
|                                          | <b>2h</b>          | <b>4h</b>          | <b>8h</b>          | <b>12h</b>         | <b>18h</b>  |
| EGF vs Ctrl                              | <b>0.0209 (*)</b>  | 0.2186 (ns)        | 0.6673 (ns)        | 0.3154 (ns)        | 0.6399 (ns) |
| PGE <sub>2</sub> vs Ctrl                 | 0.9348 (ns)        | <b>0.0404 (*)</b>  | 0.2096 (ns)        | 0.3951 (ns)        | 0.626 (ns)  |
| EGF+PGE <sub>2</sub> vs Ctrl             | <b>0.0176 (*)</b>  | <b>0.0234 (*)</b>  | <b>0.0425 (*)</b>  | 0.7041 (ns)        | 0.8686 (ns) |
| EGF+PGE <sub>2</sub> vs EGF              | 0.2544 (ns)        | 0.1082 (ns)        | 0.0584 (ns)        | 0.8884 (ns)        | 0.8641 (ns) |
| EGF+PGE <sub>2</sub> vs PGE <sub>2</sub> | <b>0.0427 (*)</b>  | 0.6278 (ns)        | 0.2048 (ns)        | 0.4812 (ns)        | 0.8906 (ns) |
| <b><i>NOS2</i></b>                       |                    |                    |                    |                    |             |
|                                          | <b>2h</b>          | <b>4h</b>          | <b>8h</b>          | <b>12h</b>         | <b>18h</b>  |
| EGF vs Ctrl                              | <b>0.0154 (*)</b>  | 0.1439 (ns)        | 0.7117 (ns)        | 0.3801 (ns)        | 0.8395 (ns) |
| PGE <sub>2</sub> vs Ctrl                 | 0.6713 (ns)        | <b>0.0223 (*)</b>  | 0.2408 (ns)        | 0.141 (ns)         | 0.6198 (ns) |
| EGF+PGE <sub>2</sub> vs Ctrl             | 0.0528 (ns)        | <b>0.0277 (*)</b>  | 0.0642 (ns)        | 0.4411 (ns)        | 0.0854 (ns) |
| EGF+PGE <sub>2</sub> vs EGF              | 0.1602 (ns)        | 0.0905 (ns)        | 0.0955 (ns)        | 0.2801 (ns)        | 0.1682 (ns) |
| EGF+PGE <sub>2</sub> vs PGE <sub>2</sub> | 0.0767 (ns)        | 0.5783 (ns)        | 0.0577 (ns)        | 0.2323 (ns)        | 0.797 (ns)  |

ns = non significant; \* p < 0.05; \*\* p < 0.01.



**Supplementary Table 2: Statistical analysis of BrdU incorporation assay in performed in GLC82 cells**

| <b>Parental Cells</b>                    |                    |                     |                     |                    |             |
|------------------------------------------|--------------------|---------------------|---------------------|--------------------|-------------|
|                                          | <b>8h</b>          | <b>16h</b>          | <b>24h</b>          | <b>36h</b>         | <b>48h</b>  |
| EGF vs Ctrl                              | <b>0.0033 (**)</b> | <b>0.001 (***)</b>  | <b>0.0008 (***)</b> | <b>0.0444 (*)</b>  | 0.0642 (ns) |
| PGE <sub>2</sub> vs Ctrl                 | 0.1592 (ns)        | <b>0.0009 (***)</b> | <b>0.0014 (**)</b>  | 0.7123 (ns)        | 0.2115 (ns) |
| EGF+PGE <sub>2</sub> vs Ctrl             | 0.3788 (ns)        | <b>0.0003 (***)</b> | <b>0.0009 (***)</b> | <b>0.0316 (*)</b>  | 0.1505 (ns) |
| EGF+PGE <sub>2</sub> vs EGF              | <b>0.0263 (*)</b>  | 0.2163 (ns)         | 0.2552 (ns)         | 0.076 (ns)         | 0.8121 (ns) |
| EGF+PGE <sub>2</sub> vs PGE <sub>2</sub> | 0.6068 (ns)        | 0.2396 (ns)         | 0.1087 (ns)         | <b>0.0347 (*)</b>  | 0.4667 (ns) |
| <b>Empty Vector</b>                      |                    |                     |                     |                    |             |
|                                          | <b>8h</b>          | <b>16h</b>          | <b>24h</b>          | <b>36h</b>         | <b>48h</b>  |
| EGF vs Ctrl                              | 0.1616 (ns)        | 0.0574 (ns)         | 0.2028 (ns)         | 0.064 (ns)         | 0.0859 (ns) |
| PGE <sub>2</sub> vs Ctrl                 | 0.1038 (ns)        | 0.3357 (ns)         | 0.0715 (ns)         | 0.2396 (ns)        | 0.2351 (ns) |
| EGF+PGE <sub>2</sub> vs Ctrl             | 0.0947 (ns)        | 0.217 (ns)          | 0.089 (ns)          | 0.2375 (ns)        | 0.3169 (ns) |
| EGF+PGE <sub>2</sub> vs EGF              | 0.5923 (ns)        | 0.7549 (ns)         | 0.0552 (ns)         | 0.0877(ns)         | 0.1148 (ns) |
| EGF+PGE <sub>2</sub> vs PGE <sub>2</sub> | 0.9716 (ns)        | 0.706 (ns)          | 0.7133 (ns)         | 0.8906 (ns)        | 0.9459 (ns) |
| <b>EGFR WT</b>                           |                    |                     |                     |                    |             |
|                                          | <b>8h</b>          | <b>16h</b>          | <b>24h</b>          | <b>36h</b>         | <b>48h</b>  |
| EGF vs Ctrl                              | 0.4603 (ns)        | <b>0.0046 (**)</b>  | <b>0.0008 (***)</b> | 0.0811 (ns)        | 0.1751 (ns) |
| PGE <sub>2</sub> vs Ctrl                 | 0.1211 (ns)        | <b>0.0015 (**)</b>  | <b>0.0225 (*)</b>   | 0.0881 (ns)        | 0.1965 (ns) |
| EGF+PGE <sub>2</sub> vs Ctrl             | 0.4308 (ns)        | <b>0.0026 (**)</b>  | <b>0.0005 (***)</b> | <b>0.0076 (**)</b> | 0.189 (ns)  |
| EGF+PGE <sub>2</sub> vs EGF              | 0.8996 (ns)        | 0.3924 (ns)         | <b>0.0223 (*)</b>   | 0.1405 (ns)        | 0.0861 (ns) |
| EGF+PGE <sub>2</sub> vs PGE <sub>2</sub> | 0.9745 (ns)        | 0.4082 (ns)         | <b>0.0064 (**)</b>  | 0.0159 (*)         | 0.873 (ns)  |
| <b>EGFR NLS12</b>                        |                    |                     |                     |                    |             |
|                                          | <b>8h</b>          | <b>16h</b>          | <b>24h</b>          | <b>36h</b>         | <b>48h</b>  |
| EGF vs Ctrl                              | 0.1182 (ns)        | 0.4602 (ns)         | 0.3961 (ns)         | 0.0956 (ns)        | 0.2923 (ns) |
| PGE <sub>2</sub> vs Ctrl                 | 0.1025 (ns)        | 0.6062 (ns)         | 0.0935 (ns)         | 0.0546 (ns)        | 0.0847 (ns) |
| EGF+PGE <sub>2</sub> vs Ctrl             | 0.439 (ns)         | 0.6234 (ns)         | 0.4079 (ns)         | 0.0969 (ns)        | 0.2469 (ns) |
| EGF+PGE <sub>2</sub> vs EGF              | 0.4978 (ns)        | 0.3884 (ns)         | 0.6226 (ns)         | 0.9439 (ns)        | 0.8864 (ns) |
| EGF+PGE <sub>2</sub> vs PGE <sub>2</sub> | 0.6185 (ns)        | 0.4847 (ns)         | 0.6294 (ns)         | 0.5296 (ns)        | 0.7032 (ns) |
| <b>EGFR dNLS</b>                         |                    |                     |                     |                    |             |
|                                          | <b>8h</b>          | <b>16h</b>          | <b>24h</b>          | <b>36h</b>         | <b>48h</b>  |
| EGF vs Ctrl                              | 0.2931 (ns)        | 0.0972 (ns)         | 0.2696 (ns)         | 0.1486 (ns)        | 0.3583 (ns) |
| PGE <sub>2</sub> vs Ctrl                 | 0.2325 (ns)        | 0.105 (ns)          | 0.3329 (ns)         | 0.4004 (ns)        | 0.2551 (ns) |
| EGF+PGE <sub>2</sub> vs Ctrl             | 0.2478 (ns)        | 0.3345 (ns)         | 0.3172 (ns)         | 0.1272 (ns)        | 0.3460 (ns) |
| EGF+PGE <sub>2</sub> vs EGF              | 0.5336 (ns)        | 0.9361 (ns)         | 0.6233 (ns)         | 0.8117 (ns)        | 0.7746 (ns) |
| EGF+PGE <sub>2</sub> vs PGE <sub>2</sub> | 0.9205 (ns)        | 0.8691 (ns)         | 0.9898 (ns)         | 0.3848 (ns)        | 0.7442 (ns) |

ns = non significant; \* p < 0.05; \*\* p < 0.01; \*\*\* p < 0.001.

**Supplementary Table 3: List of siRNA sequences**

| <b>Target</b>                   | <b>Target Sequence (5'-3')</b> |
|---------------------------------|--------------------------------|
| AllStars Negative Control siRNA | -                              |
| Clathrin Heavy Chain 1A         | AAGGAGAGTCTCAGCCAGTGA          |
| Clathrin Heavy Chain 1B         | TAATCCAATTCGAAGACCAAT          |
| Caveolin 1A                     | AACTAAACACCTCAACGATGA          |
| Caveolin 1B                     | AAGCATCAACTTGCAGAAAGA          |
| Importin $\beta$ 1A             | CTGGAATCGTCCAGGGATTAA          |
| Importin $\beta$ 1B             | AAGGGCGGAGATCGAAGACTA          |

**Supplementary Table 4: List of qPCR primers**

| <b>Name</b> | <b>Forward primer (5'-3')</b> | <b>Reverse primer (5'-3')</b> |
|-------------|-------------------------------|-------------------------------|
| RPL19       | GATGCCGGAAAAACACCTTG          | TGGCTGTACCCTTCCGCTT           |
| CCND1       | GACCTTCGTTGCCCTCTGT           | GGTTCAGGCCTTGCACTG            |
| PTGS2       | GCTTTATGCTGAAGCCCTATGA        | TCCA ACTCTGCAGACATTCC         |
| MYC         | CACCAGCAGCGACTCTGA            | CTGTGAGGAGGTTTGCTGTG          |
| NOS2        | GCTGCCAAGCTGAAATTGA           | GATAGCGCTTCTGGCTCTTG          |
